# Supplementary material for: The development of structural covariance networks during the transition from childhood to adolescence
Source: PubMed Central journal article supplement (PMC8097025; doi:10.1038/s41598-021-88918-w), 2021-05-04
Supplement: 41598_2021_88918_MOESM1_ESM.pdf [file 41598_2021_88918_MOESM1_ESM.pdf]

# The development of structural covariance networks during the transition from childhood to adolescence

Nandita Vijayakumar, Gareth Ball, Marc L Seal, Lisa Mundy, Sarah Whittle, Tim Silk

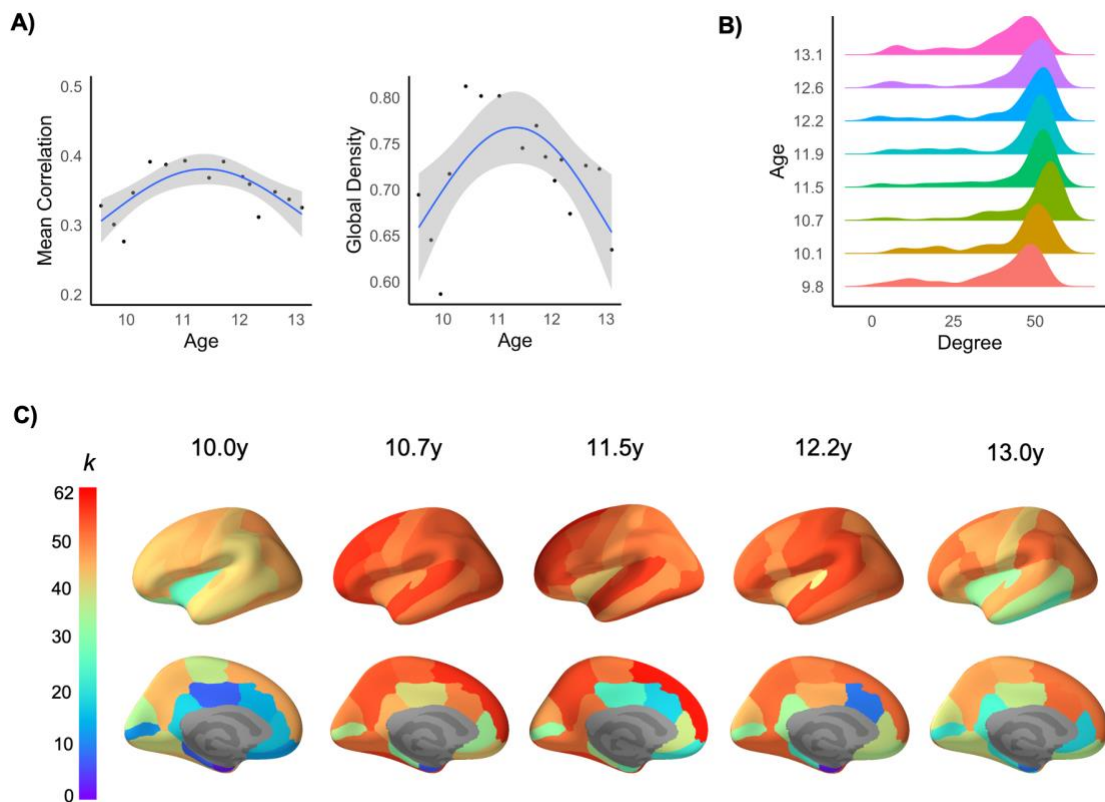

*Figure S1.* A) Changes in global properties of SCNs for the DKT parcellation, illustrating nonlinear change in mean strength of positive correlations across the network, and global edge density of the bootstrap-thresholded network. B) Changes in degree distribution of bootstrap-thresholded networks, and C) Nodal degree ( $k$ ) across the left cortex at 5 age-bins between late childhood and mid-adolescence. Effect sizes are illustrated for the sliding window size of 80 and step of 25%.

Table S1. Model comparisons and coefficients for global metrics

|                  | Across configurations |   | Bin 80, Step 25% |        |               |       |        |        |       |
|------------------|-----------------------|---|------------------|--------|---------------|-------|--------|--------|-------|
|                  |                       |   | AIC              |        | s(Age)        |       |        |        |       |
|                  | Best Fit              | # | Null             | Linear | Smooth        | EDF   | Ref DF | F      | p     |
| <u>HCP-MMP1</u>  |                       |   |                  |        |               |       |        |        |       |
| Mean correlation | Smooth                | 8 | -71.36           | -73.46 | <b>-81.63</b> | 1.927 | 1.995  | 9.650  | 0.003 |
| Global density   | Smooth                | 9 | -35.05           | -36.13 | <b>-49.07</b> | 1.957 | 1.998  | 13.521 | 0.001 |
| <u>DKT</u>       |                       |   |                  |        |               |       |        |        |       |
| Mean correlation | Smooth                | 8 | -54.30           | -52.59 | <b>-61.90</b> | 1.937 | 1.996  | 6.730  | 0.011 |
| Global density   | Smooth                | 7 | -40.24           | -38.25 | <b>-45.72</b> | 1.918 | 1.993  | 4.893  | 0.026 |

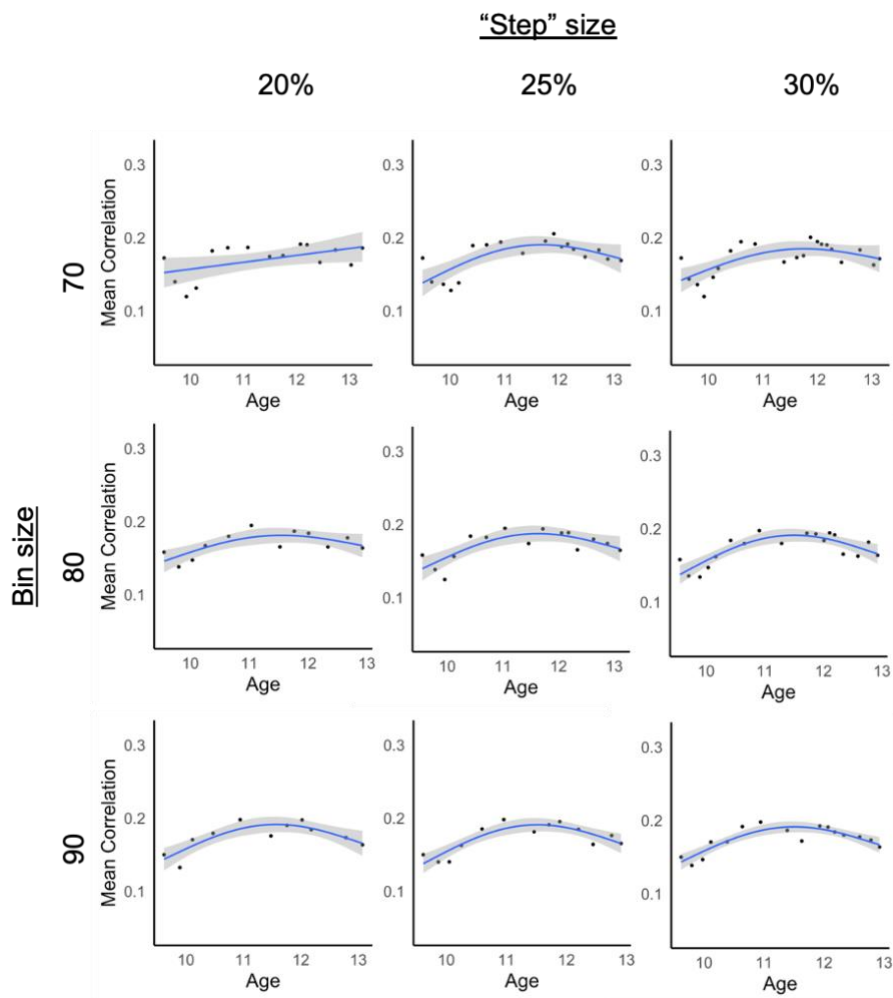

Figure S2. Age-related changes in mean correlation for each sliding window configuration.

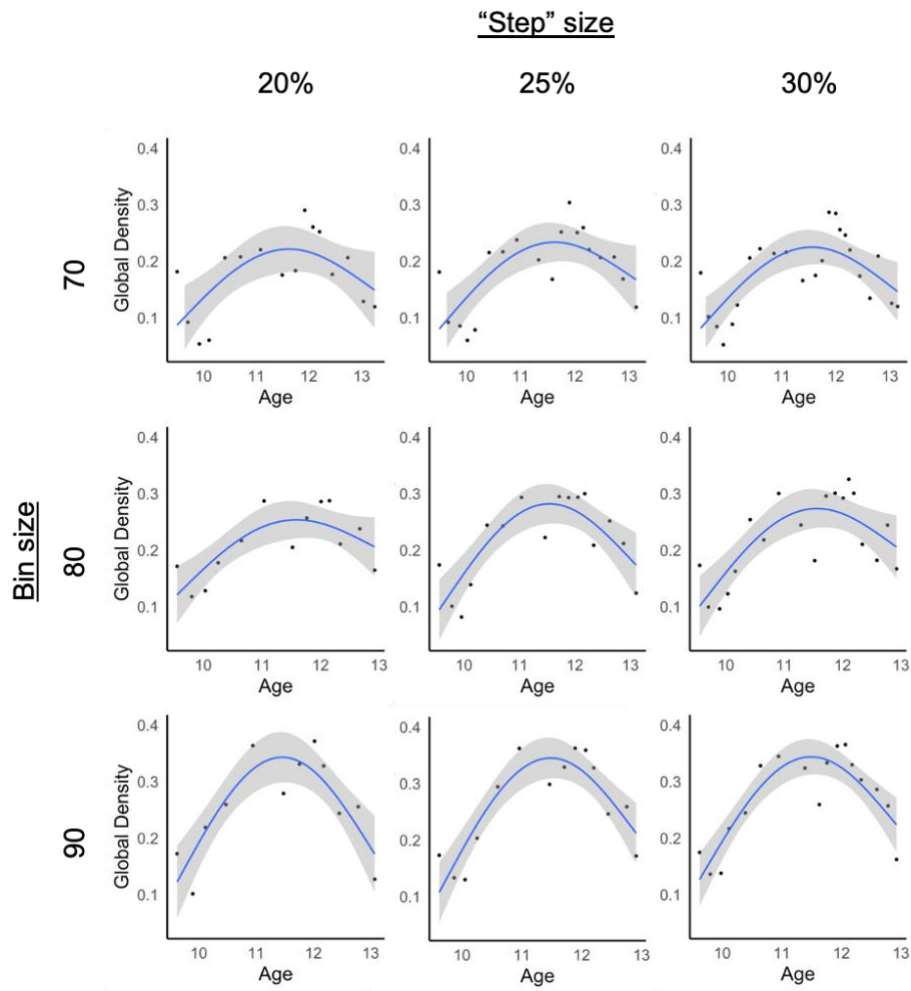

*Figure S3.* Age-related changes in global density for each sliding window configuration.

Table S2. Model comparisons and coefficients for nodal hubs

| Regions  | Across configurations |   | Bin 80, Step 25% |              |              |        |        |       |       |       |
|----------|-----------------------|---|------------------|--------------|--------------|--------|--------|-------|-------|-------|
|          | Best Fit              | # | AIC              |              |              | s(Age) |        |       |       |       |
|          |                       |   | Null             | Linear       | Smooth       | EDF    | Ref DF | F     | p     | FDR   |
| L_1      | S                     | 7 | 26.90            | 21.50        | <b>13.30</b> | 1.93   | 1.99   | 12.00 | 0.001 | 0.003 |
| L_11l    | N                     | 5 | 28.00            | 24.60        | <b>21.20</b> | 1.84   | 1.97   | 6.64  | 0.015 | 0.029 |
| L_2      | N                     | 9 | <b>35.70</b>     | 36.60        | 36.60        | 1.00   | 1.00   | 1.03  | 0.326 | 0.389 |
| L_31pd   | S                     | 9 | 48.60            | 50.40        | <b>32.80</b> | 1.97   | 2.00   | 15.40 | 0.000 | 0.001 |
| L_31pv   | S                     | 5 | 31.20            | 33.20        | <b>25.40</b> | 1.92   | 1.99   | 5.04  | 0.023 | 0.043 |
| L_3a     | S                     | 9 | 46.50            | 43.50        | <b>28.90</b> | 1.96   | 2.00   | 18.70 | 0.000 | 0.001 |
| L_3b     | L                     | 9 | 36.10            | <b>21.10</b> | 21.20        | 1.08   | 1.16   | 23.60 | 0.000 | 0.001 |
| L_4      | L                     | 9 | 43.60            | <b>20.40</b> | 20.40        | 1.00   | 1.00   | 53.60 | 0.000 | 0.000 |
| L_45     | L                     | 7 | 30.10            | <b>22.50</b> | 22.50        | 1.00   | 1.00   | 11.60 | 0.004 | 0.010 |
| L_47l    | N                     | 9 | <b>30.80</b>     | 31.00        | 31.00        | 1.50   | 1.75   | 0.94  | 0.294 | 0.363 |
| L_6d     | S                     | 5 | 25.00            | 25.50        | <b>12.60</b> | 1.96   | 2.00   | 11.00 | 0.001 | 0.004 |
| L_7m     | L                     | 7 | 37.80            | <b>27.70</b> | 27.70        | 1.00   | 1.00   | 15.80 | 0.001 | 0.004 |
| L_7PC    | L                     | 7 | 41.50            | <b>29.70</b> | 30.00        | 1.28   | 1.48   | 14.60 | 0.001 | 0.004 |
| L_8Ad    | L                     | 6 | 39.20            | <b>32.50</b> | 32.50        | 1.00   | 1.00   | 10.10 | 0.006 | 0.014 |
| L_8Av    | N                     | 8 | <b>33.70</b>     | 33.90        | 33.90        | 1.00   | 1.00   | 1.65  | 0.220 | 0.307 |
| L_8BM    | L                     | 7 | 51.20            | <b>45.90</b> | 45.90        | 1.49   | 1.74   | 4.30  | 0.027 | 0.050 |
| L_8C     | L                     | 9 | 55.10            | <b>42.90</b> | 43.10        | 1.41   | 1.65   | 14.30 | 0.001 | 0.004 |
| L_9.46d  | N                     | 8 | <b>10.90</b>     | 11.60        | 11.60        | 1.00   | 1.00   | 1.24  | 0.284 | 0.356 |
| L_9a     | S                     | 7 | 40.70            | 41.10        | <b>23.10</b> | 1.97   | 2.00   | 18.40 | 0.000 | 0.001 |
| L_9m     | N                     | 9 | <b>31.30</b>     | 31.70        | 31.70        | 1.00   | 1.00   | 1.47  | 0.245 | 0.318 |
| L_9p     | N                     | 8 | <b>35.40</b>     | 36.70        | 36.70        | 1.00   | 1.00   | 0.62  | 0.443 | 0.482 |
| L_A1     | L                     | 9 | 42.40            | <b>29.20</b> | 29.40        | 1.14   | 1.26   | 18.70 | 0.000 | 0.003 |
| L_a47r   | L                     | 9 | 30.40            | <b>18.50</b> | 18.50        | 1.00   | 1.00   | 19.50 | 0.000 | 0.003 |
| L_A5     | L                     | 9 | 39.60            | <b>26.00</b> | 26.00        | 1.00   | 1.00   | 23.10 | 0.000 | 0.001 |
| L_AIP    | S                     | 8 | 39.00            | 38.50        | <b>29.80</b> | 1.93   | 2.00   | 7.61  | 0.005 | 0.012 |
| L_FOP4   | N                     | 8 | <b>29.60</b>     | 30.00        | 30.00        | 1.00   | 1.00   | 1.50  | 0.241 | 0.318 |
| L_FOP5   | N                     | 7 | <b>32.50</b>     | 33.40        | 33.40        | 1.00   | 1.00   | 1.01  | 0.332 | 0.390 |
| L_IFJa   | N                     | 7 | <b>33.10</b>     | 33.60        | 33.60        | 1.00   | 1.00   | 1.37  | 0.261 | 0.333 |
| L_LBelt  | S                     | 9 | 49.90            | 48.30        | <b>39.80</b> | 1.93   | 1.99   | 9.23  | 0.004 | 0.009 |
| L_MBelt  | S                     | 6 | 37.50            | 21.80        | <b>15.00</b> | 1.91   | 1.99   | 28.80 | 0.000 | 0.000 |
| L_p10p   | L                     | 7 | 39.90            | <b>34.90</b> | 32.90        | 1.77   | 1.95   | 5.35  | 0.014 | 0.028 |
| L_p9.46v | N                     | 8 | <b>32.30</b>     | 29.50        | 29.70        | 1.42   | 1.66   | 4.04  | 0.081 | 0.133 |
| L_PF     | L                     | 7 | 20.60            | <b>11.00</b> | 11.00        | 1.00   | 1.00   | 15.00 | 0.002 | 0.005 |
| L_PFcM   | S                     | 9 | 36.10            | 33.60        | <b>16.40</b> | 1.97   | 2.00   | 22.10 | 0.000 | 0.000 |
| L_PFt    | S                     | 9 | 47.30            | 43.80        | <b>30.30</b> | 1.96   | 2.00   | 16.80 | 0.000 | 0.001 |
| L_PGi    | S                     | 5 | <b>40.50</b>     | 42.10        | 38.40        | 1.85   | 1.98   | 2.47  | 0.109 | 0.172 |
| L_TGd    | S                     | 6 | 34.70            | 33.40        | <b>29.60</b> | 1.85   | 1.98   | 4.14  | 0.031 | 0.057 |
| L_TPOJ2  | S                     | 9 | 43.00            | 44.70        | <b>32.80</b> | 1.95   | 2.00   | 8.99  | 0.003 | 0.009 |
| L_V2     | N                     | 8 | <b>19.90</b>     | 21.00        | 21.00        | 1.00   | 1.00   | 0.81  | 0.382 | 0.435 |
| L_V3     | N                     | 9 | <b>26.60</b>     | 27.40        | 27.70        | 1.19   | 1.35   | 1.07  | 0.408 | 0.457 |
| R_23c    | S                     | 7 | 51.50            | 29.70        | <b>22.70</b> | 1.91   | 1.99   | 42.50 | 0.000 | 0.000 |
| R_31pv   | N                     | 7 | <b>36.20</b>     | 36.40        | 36.70        | 1.35   | 1.58   | 1.68  | 0.308 | 0.374 |
| R_3a     | S                     | 9 | 45.60            | 44.80        | <b>37.00</b> | 1.92   | 1.99   | 7.82  | 0.007 | 0.014 |
| R_4      | N                     | 9 | <b>16.10</b>     | 14.90        | 15.20        | 1.27   | 1.47   | 1.75  | 0.154 | 0.233 |
| R_46     | N                     | 5 | <b>11.90</b>     | 9.80         | 10.10        | 1.25   | 1.44   | 3.54  | 0.097 | 0.156 |
| R_6a     | N                     | 6 | <b>38.80</b>     | 37.10        | 37.10        | 1.00   | 1.00   | 3.63  | 0.077 | 0.132 |
| R_6ma    | S                     | 9 | 45.80            | 36.00        | <b>32.80</b> | 1.83   | 1.97   | 11.00 | 0.001 | 0.004 |
| R_6r     | N                     | 7 | <b>35.50</b>     | 37.40        | 35.30        | 1.78   | 1.95   | 1.51  | 0.242 | 0.318 |
| R_7m     | S                     | 5 | 43.20            | <b>37.50</b> | 35.60        | 1.77   | 1.95   | 5.79  | 0.011 | 0.023 |
| R_8C     | N                     | 8 | <b>27.60</b>     | 28.90        | 28.90        | 1.00   | 1.00   | 0.65  | 0.433 | 0.478 |
| R_9.46d  | N                     | 9 | <b>38.40</b>     | 40.30        | 40.30        | 1.00   | 1.00   | 0.01  | 0.932 | 0.936 |
| R_9m     | L                     | 9 | 31.90            | <b>16.90</b> | 16.90        | 1.00   | 1.00   | 26.60 | 0.000 | 0.001 |
| R_a10p   | S                     | 5 | 35.00            | 31.50        | <b>26.20</b> | 1.89   | 1.99   | 8.19  | 0.006 | 0.014 |
| R_A5     | L                     | 5 | 36.00            | <b>24.50</b> | 23.00        | 1.74   | 1.93   | 11.10 | 0.001 | 0.004 |
| R_AIP    | N                     | 7 | <b>46.60</b>     | 46.70        | 46.70        | 1.00   | 1.00   | 1.69  | 0.214 | 0.307 |
| R_IFSa   | N                     | 6 | <b>33.20</b>     | 35.00        | 35.00        | 1.00   | 1.00   | 0.22  | 0.645 | 0.682 |
| R_IP1    | N                     | 7 | <b>37.40</b>     | 35.20        | 35.20        | 1.00   | 1.00   | 4.13  | 0.061 | 0.108 |
| R_IP2    | S                     | 5 | 41.20            | 39.60        | <b>25.30</b> | 1.96   | 2.00   | 16.00 | 0.000 | 0.001 |
| R_MBelt  | N                     | 6 | <b>44.70</b>     | 44.00        | 44.00        | 1.00   | 1.00   | 2.62  | 0.127 | 0.196 |

|         |   |   |              |              |              |      |      |       |       |       |
|---------|---|---|--------------|--------------|--------------|------|------|-------|-------|-------|
| R_OP4   | S | 9 | 54.50        | 55.40        | <b>43.40</b> | 1.95 | 2.00 | 9.61  | 0.002 | 0.006 |
| R_p47r  | L | 5 | 40.40        | <b>30.60</b> | 30.60        | 1.01 | 1.03 | 14.80 | 0.002 | 0.005 |
| R_PCV   | S | 8 | 47.20        | 40.80        | <b>34.60</b> | 1.90 | 1.99 | 12.30 | 0.001 | 0.004 |
| R_PF    | N | 5 | <b>31.70</b> | 32.50        | 28.80        | 1.85 | 1.98 | 2.85  | 0.079 | 0.132 |
| R_PFCm  | N | 5 | <b>38.50</b> | 40.50        | 40.50        | 1.00 | 1.00 | 0.01  | 0.936 | 0.936 |
| R_PGi   | N | 5 | <b>35.90</b> | 35.40        | 35.50        | 1.12 | 1.22 | 1.72  | 0.178 | 0.263 |
| R_PGp   | N | 7 | <b>21.10</b> | 21.80        | 22.00        | 1.08 | 1.15 | 0.87  | 0.340 | 0.393 |
| R_RI    | N | 8 | <b>25.40</b> | 27.40        | 27.70        | 1.27 | 1.46 | 0.11  | 0.845 | 0.868 |
| R_TE1a  | N | 8 | <b>38.20</b> | 39.80        | 39.80        | 1.00 | 1.00 | 0.33  | 0.573 | 0.615 |
| R_TPOJ1 | S | 7 | 44.20        | 44.50        | <b>33.40</b> | 1.95 | 2.00 | 9.29  | 0.002 | 0.007 |
| R_V1    | N | 6 | <b>38.50</b> | 39.60        | 38.00        | 1.74 | 1.93 | 1.40  | 0.227 | 0.311 |
| R_V2    | N | 9 | <b>27.90</b> | 28.10        | 28.10        | 1.00 | 1.00 | 1.68  | 0.216 | 0.307 |
| R_V3    | N | 9 | <b>29.50</b> | 31.40        | 31.40        | 1.00 | 1.00 | 0.08  | 0.780 | 0.813 |
| R_V4    | S | 5 | 37.90        | 36.20        | <b>28.10</b> | 1.92 | 1.99 | 8.05  | 0.004 | 0.010 |
| R_V6    | L | 9 | 38.80        | <b>27.10</b> | 27.10        | 1.00 | 1.00 | 19.00 | 0.001 | 0.003 |

NB: “Across configurations” refers to best-fitting models across the 9 window configurations. L:

Linear, N: Null, S: Smooth, #: number of window configurations

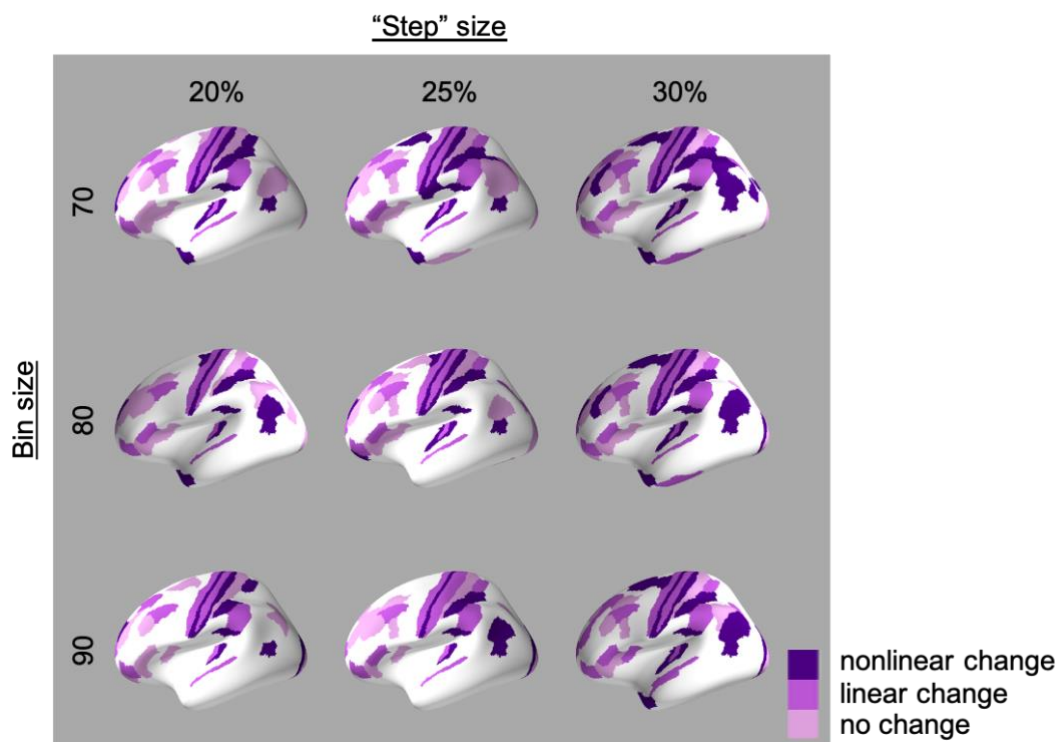

Figure S4. Age-related changes in standardized degree of hub regions for each sliding window configuration.

Table S3. Model comparisons and coefficients for modules

|         | Across configurations |   | Bin 80, Step 25% |                |               |      |        |       |       |       |
|---------|-----------------------|---|------------------|----------------|---------------|------|--------|-------|-------|-------|
|         | Best Fit              | # | AIC              |                |               |      | s(Age) |       |       |       |
|         |                       |   | Null             | Linear         | Smooth        | EDF  | Ref DF | F     | p     | FDR   |
| Vis_Vis | L                     | 9 | 1.83             | <b>-8.95</b>   | -8.95         | 1.00 | 1.00   | 17.11 | 0.001 | 0.004 |
| SM_Vis  | S                     | 7 | -6.58            | -15.07         | <b>-22.36</b> | 1.92 | 1.99   | 14.74 | 0.000 | 0.002 |
| SM_SM   | L                     | 5 | 14.90            | <b>11.02</b>   | 9.86          | 1.71 | 1.91   | 5.53  | 0.033 | 0.046 |
| DA_Vis  | N                     | 6 | -31.79           | <b>-35.52*</b> | -35.45        | 1.48 | 1.72   | 4.84  | 0.053 | 0.080 |
| DA_SM   | N                     | 9 | <b>-15.97</b>    | -14.11         | -13.84        | 1.22 | 1.40   | 0.253 | 0.783 | 0.783 |
| DA_DA   | S                     | 9 | 2.47             | -0.54          | <b>-15.85</b> | 1.97 | 2.00   | 18.90 | 0.000 | 0.000 |
| VA_Vis  | S                     | 7 | -23.94           | -22.00         | <b>-29.61</b> | 1.92 | 1.99   | 4.95  | 0.024 | 0.042 |
| VA_SM   | N                     | 9 | <b>-22.26</b>    | -22.96         | -23.04        | 1.53 | 1.78   | 1.43  | 0.191 | 0.223 |
| VA_DA   | L                     | 9 | -27.01           | <b>-45.87</b>  | -45.87        | 1.00 | 1.00   | 37.55 | 0.000 | 0.000 |
| VA_VA   | N                     | 8 | <b>-35.22</b>    | -36.28         | -36.28        | 1.00 | 1.00   | 2.95  | 0.108 | 0.126 |
| Lim_Vis | N                     | 9 | <b>-22.43</b>    | -20.84         | -20.84        | 1.00 | 1.00   | 0.365 | 0.555 | 0.583 |
| Lim_SM  | L                     | 9 | -26.50           | <b>-34.30</b>  | -34.83        | 1.63 | 1.86   | 6.52  | 0.008 | 0.016 |
| Lim_DA  | N                     | 6 | <b>-43.07</b>    | -44.41         | -46.36        | 1.77 | 1.95   | 2.87  | 0.068 | 0.096 |
| Lim_VA  | N                     | 9 | <b>-32.93</b>    | -31.61         | -31.61        | 1.00 | 1.00   | 0.60  | 0.449 | 0.500 |
| Lim_Lim | N                     | 5 | 7.36             | 8.97           | <b>1.79*</b>  | 1.92 | 1.99   | 5.07  | 0.025 | 0.044 |
| FP_Vis  | S                     | 8 | -6.55            | -4.56          | <b>-16.77</b> | 1.95 | 2.00   | 8.90  | 0.003 | 0.010 |
| FP_SM   | N                     | 6 | <b>-13.10</b>    | -11.16         | -13.97        | 1.82 | 1.97   | 1.86  | 0.184 | 0.223 |
| FP_DA   | S                     | 5 | -8.27            | -21.89         | <b>-26.70</b> | 1.88 | 1.99   | 18.52 | 0.000 | 0.001 |
| FP_VA   | L                     | 7 | -24.57           | <b>-35.46</b>  | -35.17        | 1.26 | 1.45   | 13.41 | 0.002 | 0.008 |
| FP_Lim  | S                     | 8 | -20.85           | -20.28         | <b>-31.72</b> | 1.95 | 2.00   | 9.82  | 0.002 | 0.009 |
| FP_FP   | S                     | 7 | -4.13            | -4.95          | <b>-15.84</b> | 1.95 | 2.00   | 10.12 | 0.002 | 0.004 |
| DM_Vis  | S                     | 6 | -22.66           | -24.53         | <b>-34.28</b> | 1.94 | 2.00   | 10.82 | 0.002 | 0.008 |
| DM_SM   | N                     | 9 | <b>-18.57</b>    | -17.52         | -20.18        | 1.81 | 1.96   | 2.08  | 0.137 | 0.179 |
| DM_DA   | L                     | 8 | -11.70           | <b>-21.22</b>  | -20.93        | 1.28 | 1.48   | 9.25  | 0.004 | 0.010 |
| DM_VA   | L                     | 8 | -41.12           | <b>-46.54</b>  | -46.54        | 1.00 | 1.00   | 8.26  | 0.012 | 0.030 |
| DM_Lim  | S                     | 8 | -21.59           | -19.77         | <b>-30.52</b> | 1.95 | 2.00   | 7.79  | 0.006 | 0.014 |
| DM_FP   | S                     | 5 | -17.39           | -15.64         | <b>-22.68</b> | 1.91 | 1.99   | 4.62  | 0.028 | 0.046 |
| DM_DM   | N                     | 8 | <b>-9.83</b>     | -8.30          | -9.93         | 1.75 | 1.94   | 1.70  | 0.259 | 0.259 |

NB: “Across configurations” refers to best-fitting models across the 9 window configurations. \* Best-fitting model differed from most other sliding window configurations. DA: Dorsal Attention, DM: Default Model, FP: Frontoparietal, L: Linear, Lim: Limbic, N: Null, S: Smooth, VA: Ventral Attention, Vis: Visual, #: number of window configurations

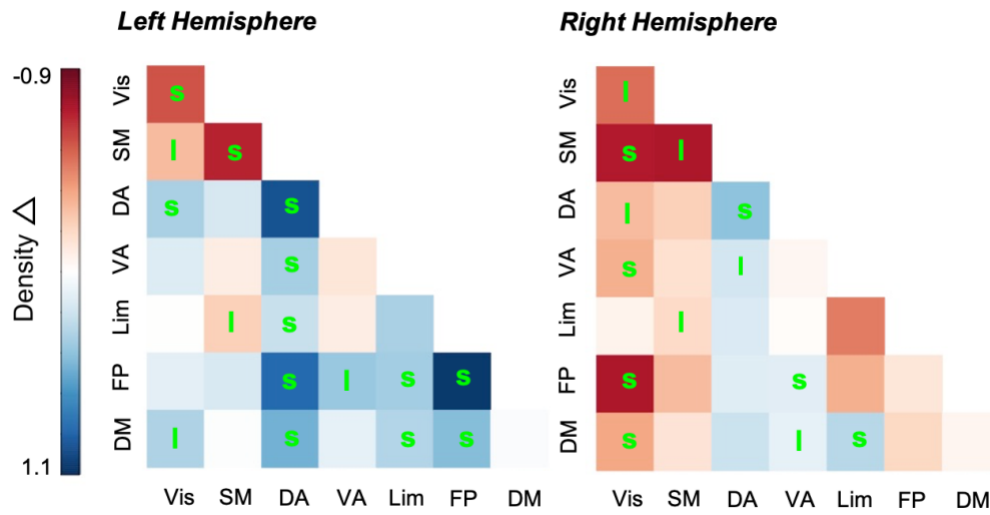

*Figure S5.* Changes in the density of connections for functional networks. A) Change in “normalized” density of connections between and within networks (*l* and *s* indicate significant linear and nonlinear trajectories, respectively). Effect size is the difference between maximum and minimum density for the sliding window size of 80 and step of 25%.

Table S4. Model comparisons and coefficients for modules examining with each sex

| Females              |   |      |               |                |               |        |      |       |       | Males                |   |      |               |                |                |        |      |       |       |       |
|----------------------|---|------|---------------|----------------|---------------|--------|------|-------|-------|----------------------|---|------|---------------|----------------|----------------|--------|------|-------|-------|-------|
| Across configuration |   |      |               |                |               |        |      |       |       | Across configuration |   |      |               |                |                |        |      |       |       |       |
| Bin 80, Step 25%     |   |      |               |                |               |        |      |       |       | Bin 80, Step 25%     |   |      |               |                |                |        |      |       |       |       |
| AIC                  |   |      |               |                |               |        |      |       |       | AIC                  |   |      |               |                |                |        |      |       |       |       |
| s(Age)               |   |      |               |                |               |        |      |       |       | s(Age)               |   |      |               |                |                |        |      |       |       |       |
| Best Fit             | # | Null | Linear        | Smooth h       | EDF           | Ref DF | F    | p     | FDR   | Best Fit             | # | Null | Linear        | Smooth         | EDF            | Ref DF | F    | p     | FDR   |       |
| Vis_Vis              | N | 8    | <b>-5.6</b>   | -5.01          | -5.49         | 1.62   | 1.85 | 1.04  | 0.284 | 0.332                | N | 6    | <b>17.69</b>  | 18.89          | 18.89          | 1.00   | 1.00 | 0.72  | 0.411 | 0.480 |
| SM_Vis               | S | 9    | -1.53         | -8.48          | <b>-41.51</b> | 1.99   | 2.00 | 94.12 | 0.000 | 0.000                | N | 9    | <b>-1.75</b>  | -2.93          | -2.93          | 1.00   | 1.00 | 3.07  | 0.101 | 0.133 |
| SM_SM                | S | 7    | 23.76         | 25.24          | <b>10.01</b>  | 1.97   | 2.00 | 12.95 | 0.001 | 0.002                | N | 8    | <b>25.34</b>  | 22.99          | 23.26          | 1.34   | 1.56 | 2.40  | 0.095 | 0.133 |
| DA_Vis               | N | 9    | <b>-18.65</b> | -16.76         | -16.76        | 1.00   | 1.00 | 0.09  | 0.767 | 0.805                | N | 6    | -3.39         | <b>-7.83*</b>  | -7.56          | 1.21   | 1.38 | 5.82  | 0.032 | 0.067 |
| DA_SM                | N | 9    | <b>-2.85</b>  | -0.92          | -3.24         | 1.79   | 1.96 | 1.58  | 0.226 | 0.297                | N | 7    | -26.86        | -25.06         | <b>-33.48</b>  | 1.93   | 1.99 | 5.64  | 0.016 | 0.059 |
| DA_DA                | S | 8    | 11.49         | 6.46           | <b>-3.02</b>  | 1.94   | 2.00 | 13.20 | 0.000 | 0.002                | S | 8    | 0.77          | 2.59           | <b>-17.8</b>   | 1.98   | 2.00 | 19.67 | 0.000 | 0.000 |
| VA_Vis               | N | 9    | <b>-25.21</b> | -24            | -23.72        | 1.23   | 1.40 | 0.37  | 0.526 | 0.581                | N | 9    | <b>-22.47</b> | -21            | -21.77         | 1.66   | 1.89 | 0.86  | 0.364 | 0.403 |
| VA_SM                | N | 9    | <b>-12.79</b> | -12.75         | -12.75        | 1.00   | 1.00 | 1.83  | 0.198 | 0.277                | N | 9    | <b>-8.56</b>  | -7.87          | -11.46         | 1.84   | 1.98 | 2.83  | 0.079 | 0.127 |
| VA_DA                | L | 7    | -5.99         | <b>-32.76</b>  | -33.7         | 1.68   | 1.90 | 40.06 | 0.000 | 0.000                | N | 9    | <b>-41.91</b> | -40            | -44.53         | 1.87   | 1.98 | 3.01  | 0.088 | 0.129 |
| VA_VA                | N | 8    | <b>-8.62</b>  | -7.87          | -8.71         | 1.67   | 1.89 | 1.16  | 0.262 | 0.332                | S | 8    | 1.09          | -0.22          | <b>-6.33</b>   | 1.90   | 1.99 | 5.97  | 0.011 | 0.020 |
| Lim_Vis              | N | 9    | <b>-13.33</b> | -11.87         | -16.03        | 1.86   | 1.98 | 2.81  | 0.085 | 0.149                | N | 8    | <b>-27.35</b> | -25.35         | -25.3          | 1.48   | 1.73 | 0.34  | 0.682 | 0.682 |
| Lim_SM               | S | 5    | -16.12        | -18.25         | <b>-22.49</b> | 1.86   | 1.98 | 5.05  | 0.018 | 0.038                | N | 5    | -5.21         | <b>-9.38*</b>  | -9.38          | 1.00   | 1.00 | 6.60  | 0.022 | 0.059 |
| Lim_DA               | N | 9    | <b>-28.76</b> | -28.27         | -28.27        | 1.00   | 1.00 | 1.38  | 0.259 | 0.320                | N | 9    | <b>-30.34</b> | -32.69         | -32.66         | 1.02   | 1.03 | 4.18  | 0.057 | 0.109 |
| Lim_VA               | N | 6    | <b>-27.18</b> | -27.23         | -27.23        | 1.00   | 1.00 | 1.91  | 0.189 | 0.277                | N | 7    | -17.57        | <b>-20.77*</b> | -20.51         | 1.35   | 1.57 | 4.41  | 0.065 | 0.114 |
| Lim_Lim              | N | 6    | 24.84         | <b>21.78*</b>  | 22.05         | 1.23   | 1.41 | 4.43  | 0.061 | 0.143                | S | 5    | 4.14          | 0.16           | <b>-10.9</b>   | 1.95   | 2.00 | 15.04 | 0.000 | 0.001 |
| FP_Vis               | S | 8    | 4.3           | 5.89           | <b>-9.5</b>   | 1.97   | 2.00 | 12.76 | 0.001 | 0.003                | N | 9    | <b>-16.36</b> | -14.53         | -18.41         | 1.85   | 1.98 | 2.70  | 0.112 | 0.138 |
| FP_SM                | S | 5    | -22.11        | -20.14         | <b>-27.58</b> | 1.92   | 1.99 | 4.89  | 0.026 | 0.050                | N | 9    | <b>12.92</b>  | 14.85          | 13.28          | 1.74   | 1.93 | 1.34  | 0.312 | 0.364 |
| FP_DA                | S | 5    | -12.34        | -20.52         | <b>-24.87</b> | 1.87   | 1.98 | 10.58 | 0.001 | 0.004                | L | 5    | -5.38         | -12.32         | <b>-16.84*</b> | 1.87   | 1.98 | 9.46  | 0.002 | 0.020 |
| FP_VA                | L | 9    | -18.59        | <b>-34.98</b>  | -34.98        | 1.00   | 1.00 | 30.19 | 0.000 | 0.000                | N | 7    | -12.21        | <b>-17.77*</b> | -17.49         | 1.32   | 1.53 | 6.68  | 0.022 | 0.059 |
| FP_Lim               | L | 6    | -4.39         | <b>-9.4</b>    | -9.4          | 1.00   | 1.00 | 7.69  | 0.015 | 0.034                | N | 7    | <b>-6.54</b>  | -5.71          | -9.07          | 1.84   | 1.97 | 2.61  | 0.092 | 0.129 |
| FP_FP                | N | 9    | <b>-10.79</b> | -8.79          | -11.23        | 1.80   | 1.96 | 1.69  | 0.222 | 0.332                | L | 9    | 9.84          | <b>-4.45</b>   | -4.45          | 1.00   | 1.00 | 24.76 | 0.000 | 0.001 |
| DM_Vis               | N | 9    | <b>-20.96</b> | -19            | -19           | 1.00   | 1.00 | 0.03  | 0.859 | 0.859                | N | 8    | -21.63        | -23.23         | <b>-27.97*</b> | 1.87   | 1.98 | 6.04  | 0.018 | 0.059 |
| DM_SM                | S | 5    | -29.43        | <b>-34.27*</b> | -37.22        | 1.82   | 1.97 | 6.03  | 0.010 | 0.026                | N | 9    | <b>-0.51</b>  | 1.46           | 1.14           | 1.59   | 1.83 | 0.53  | 0.559 | 0.587 |
| DM_DA                | S | 6    | -33.1         | -39.62         | <b>-44.32</b> | 1.87   | 1.98 | 9.22  | 0.002 | 0.006                | L | 7    | -6.94         | <b>-12.96</b>  | -13.04         | 1.53   | 1.78 | 4.87  | 0.019 | 0.059 |
| DM_VA                | L | 9    | -25.35        | <b>-38.81</b>  | -40.96        | 1.78   | 1.95 | 14.29 | 0.000 | 0.001                | N | 8    | -29.98        | -31.45         | <b>-42.62*</b> | 1.95   | 2.00 | 11.91 | 0.001 | 0.020 |
| DM_Lim               | N | 9    | <b>-24.07</b> | -22.89         | -22.89        | 1.00   | 1.00 | 0.74  | 0.405 | 0.473                | N | 6    | 0.03          | -0.32          | <b>-8.08*</b>  | 1.92   | 1.99 | 7.32  | 0.008 | 0.059 |
| DM_FP                | N | 5    | <b>-25.73</b> | -25.92         | -27.18        | 1.72   | 1.92 | 2.75  | 0.148 | 0.239                | N | 7    | <b>-4.15</b>  | -6.71          | -9.4           | 1.81   | 1.96 | 4.15  | 0.030 | 0.067 |
| DM_DM                | N | 9    | <b>-11.41</b> | -9.98          | -9.9          | 1.47   | 1.72 | 0.88  | 0.536 | 0.536                | N | 9    | <b>5.94</b>   | 7.65           | 7.78           | 1.44   | 1.69 | 0.62  | 0.625 | 0.625 |

NB: "Across configurations" refers to best-fitting models across the 9 window configurations. \* Best-fitting model differed from most other sliding window

configurations. DA: Dorsal Attention, DM: Default Model, FP: Frontoparietal, L: Linear, Lim: Limbic, N: Null, S: Smooth, VA: Ventral Attention, Vis:

Visual, #: number of window configurations
